# Supplementary material for: Low dose anti-thymocyte globulin with low dose posttransplant cyclophosphamide (low dose ATG/PTCy) can reduce the risk of graft-versus-host disease as compared with standard-dose anti-thymocyte globulin in haploidentical peripheral hematopoietic stem cell transplantation combined with unrelated cord blood
Source: PubMed Central journal article supplement (PMC7943423; doi:10.1038/s41409-020-01047-2), 2020-09-01
Supplement: 41409_2020_1047_MOESM2_ESM.pdf [file 41409_2020_1047_MOESM2_ESM.pdf]

---

**1 FIGURE LEGENDS**

2 **SupplementaryFigure 1.** The cumulative incidences (CIs) of GvHD after Haplo-HSCT.  
3 The CIs of grades II-IV aGvHD, grades III-IV aGvHD, cGvHD and moderate to severe  
4 cGvHD were shown in (A), (B), (C) and (D), respectively. The CIs of grades II-IV  
5 aGvHD and grades III-IV aGvHD were significantly lower in the low dose ATG/PTCy  
6 than that in the standard ATG dose group ( $P=0.042$  and  $P=0.025$ , respectively). There  
7 was no significant difference concerning the CIs of cGvHD ( $P=0.190$ ) between the two  
8 groups. The CI of moderate to severe cGvHD was significantly lower in the low dose  
9 ATG/PTCy than that in the standard ATG dose group ( $P=0.029$ ).

10 **SupplementaryFigure 2.** The cumulative incidences(CIs) of relapse and NRM (A),  
11 the overall survival (OS) (B), and the leukemia free survival (LFS) (C). The CI of  
12 relapse was significantly higher in the low dose ATG/PTCy than that in the standard  
13 ATG dose group ( $P=0.042$ ) . The CI of NRM was significantly lower in the low dose  
14 ATG/PTCy than that in the standard ATG dose group ( $P=0.038$ ). There were no  
15 significant differences concerning OS ( $P=0.255$ ), and LFS ( $P=0.400$ ) between the two  
16 groups.

17
