# Supplementary material for: Low dose anti-thymocyte globulin with low dose posttransplant cyclophosphamide (low dose ATG/PTCy) can reduce the risk of graft-versus-host disease as compared with standard-dose anti-thymocyte globulin in haploidentical peripheral hematopoietic stem cell transplantation combined with unrelated cord blood
Source: PubMed Central journal article supplement (PMC7943423; doi:10.1038/s41409-020-01047-2), 2020-09-01

Supplementary Figure 1.

A

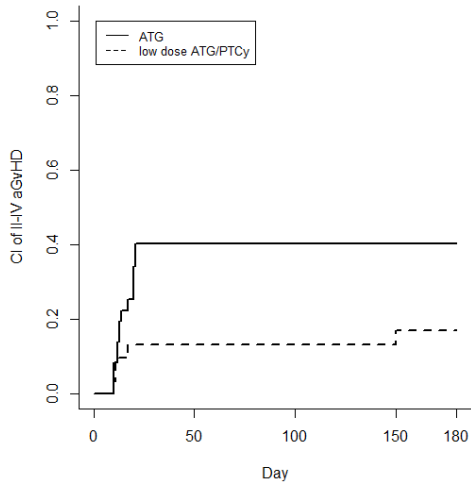

B

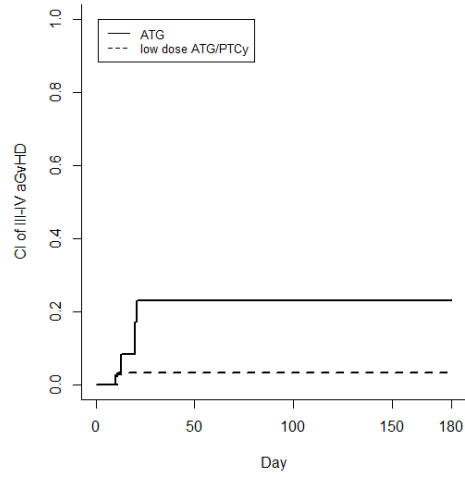

C

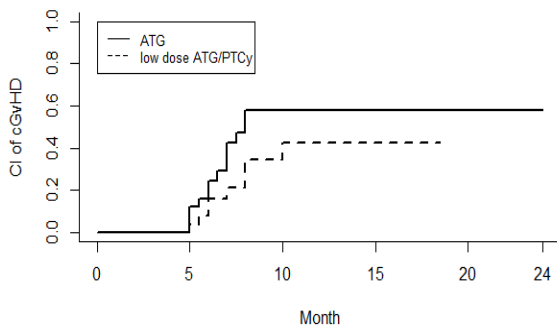

D

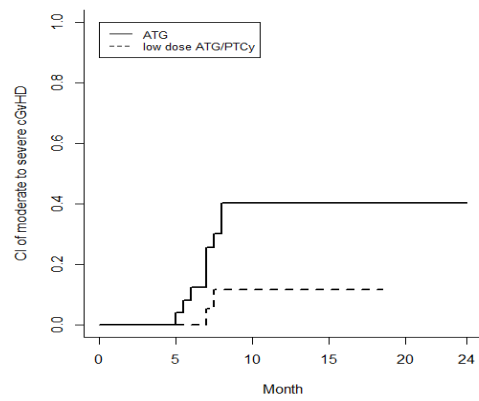

Supplement: 41409_2020_1047_MOESM3_ESM.pdf [file 41409_2020_1047_MOESM3_ESM.pdf]
